# Supplementary material for: Traditional Chinese Medication Qiliqiangxin Attenuates Diabetic Cardiomyopathy via Activating PPARγ
Source: PubMed Central journal article supplement (PMC8322738; doi:10.3389/fcvm.2021.698056), 2021-07-16
Supplement: Data_Sheet_1.pdf [file Data_Sheet_1.pdf]

## *Supplementary Material*

**Supplementary Table1: Parameters of echocardiography:**

|                              |      | Control(n=7) | QL(n=7)      | STZ(n=8)        | STZ+QL(n=7)   |
|------------------------------|------|--------------|--------------|-----------------|---------------|
| <b>MV E/A Ratio</b>          |      | 1.98±0.18    | 2.02±0.48    | 1.24±0.28 **    | 1.91±0.29 ##  |
| <b>MV E</b>                  | mm/s | 615.34±65.65 | 615.89±74.23 | 381.28±79.99 ** | 448.51±109.00 |
| <b>MV A</b>                  | mm/s | 313.00±46.48 | 318.09±67.13 | 314.77±69.83    | 241.37±67.50  |
| <b>Ejection fraction</b>     | %    | 48.19±3.23   | 49.12±4.15   | 42.62±6.19      | 45.19±5.06    |
| <b>Fractional shortening</b> | %    | 24.01±1.90   | 24.54±2.53   | 20.52±3.41      | 22.06±3.00    |
| <b>LVPW s</b>                | mm   | 0.95±0.11    | 0.81±0.11    | 0.69±0.15**     | 0.79±0.13     |
| <b>LVPW d</b>                | mm   | 0.70±0.11    | 0.62±0.08    | 0.55±0.14       | 0.58±0.12     |
| <b>LVID s</b>                | mm   | 3.15±0.14    | 3.01±0.20    | 2.89±0.39       | 2.89±0.23     |
| <b>LVID d</b>                | mm   | 4.15±0.11    | 3.99±0.19    | 3.63±0.38**     | 3.71±0.26     |
| <b>LV vol s</b>              | μl   | 39.70±4.16   | 35.65±5.72   | 32.73±10.42     | 32.26±6.16    |
| <b>LV vol d</b>              | μl   | 76.50±4.56   | 69.87±7.89   | 56.28±13.58**   | 58.88±9.33    |

Data are presented as mean ± SD.

\*\* ,  $p < 0.01$ , Control group VS STZ group; ##,  $p < 0.01$ , STZ group VS STZ+QL group;

**Supplementary Table2: Primers used in qRT-PCR:**

| Primers       | Species | Forward                 | Reverse                 |
|---------------|---------|-------------------------|-------------------------|
| <i>18S</i>    | Mouse   | GTAACCCGTTGAACCCCAT     | CCATCCAATCGGTAGTAGCG    |
| <i>Anp</i>    | Mouse   | GGAGGAGAAGATGCCGGTAGA   | GCTTCCTCAGTCTGCTCACTCA  |
| <i>Bnp</i>    | Mouse   | AGCTGCTGGAGCTGATAAGAGAA | GTGAGGCCTTGGTCCTTCAA    |
| <i>Col1a1</i> | Mouse   | GCTCCTCTTAGGGCCACT      | CCACGTCTCACCATTGGGG     |
| <i>Col3a1</i> | Mouse   | CTGTAACATGGAACTGGGGAAA  | CCATAGCTGAACTGAAAACCACC |
| <i>Nrf2</i>   | Mouse   | TCTTGGAGTAAGTCGAGAAGTGT | GTTGAACTGAGCGAAAAAGGC   |

**Supplementary Figure S1. Uncropped scans of Western blots**

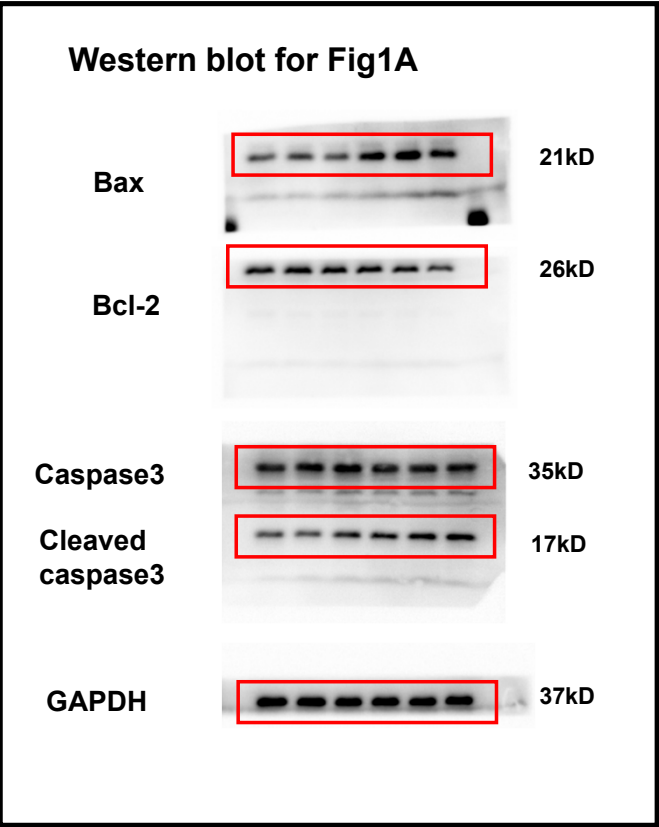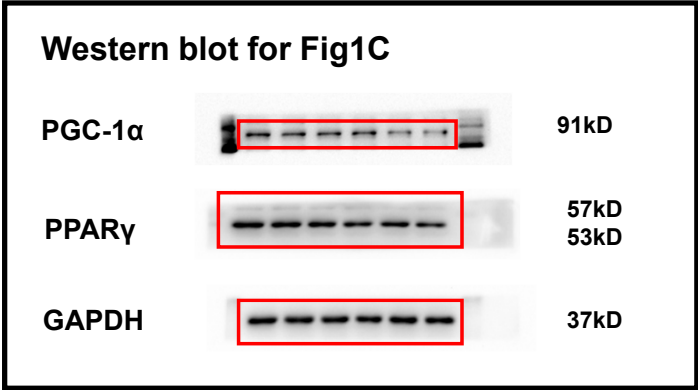

### Western blot for Fig2A

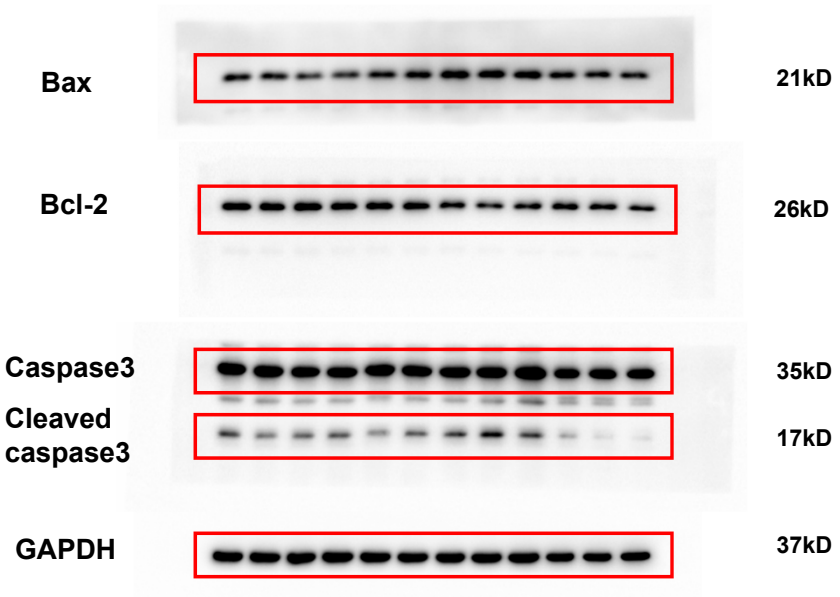

### Western blot for Fig2C

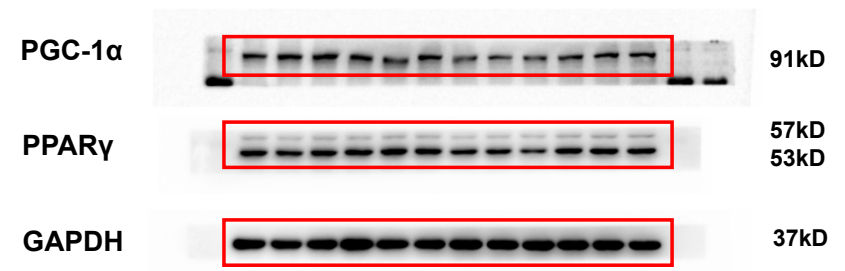

### Western blot for Fig3A

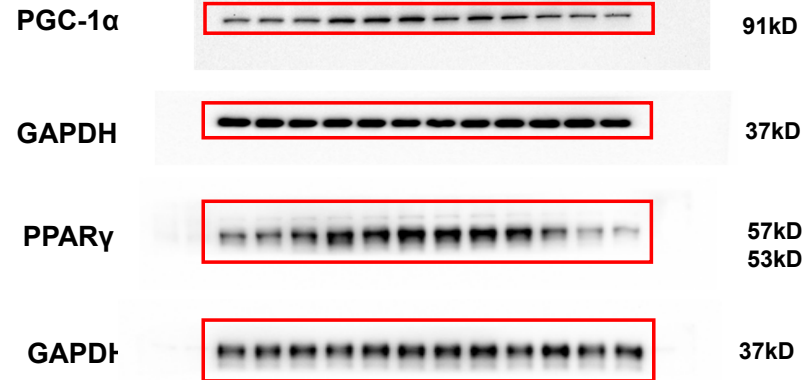

### Western blot for Fig3B

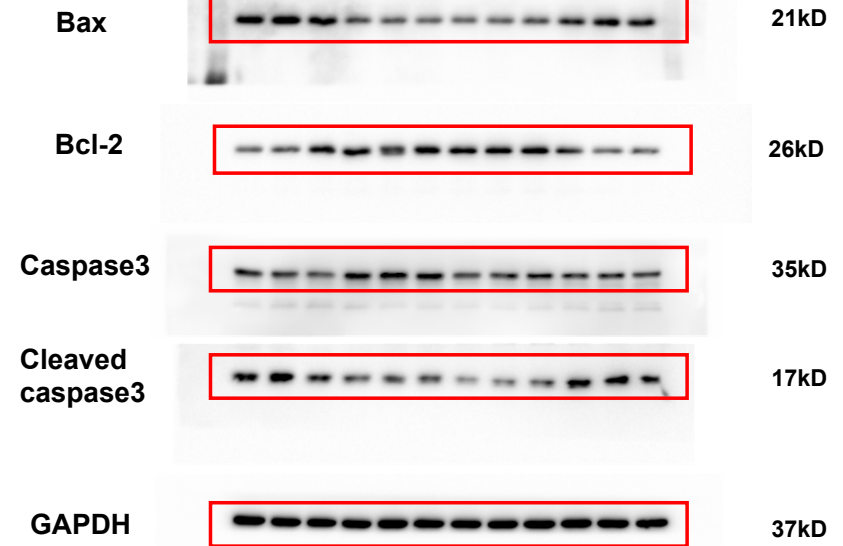

### Western blot for Fig5A

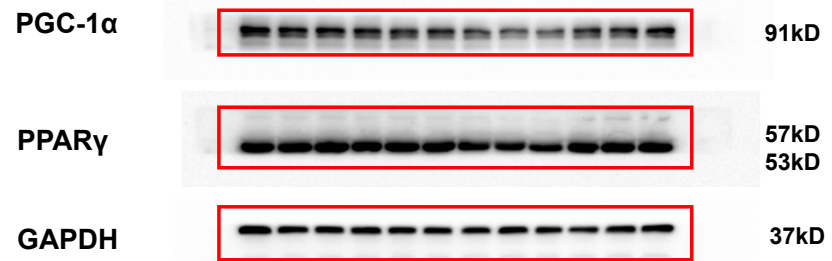

### Western blot for Fig5B

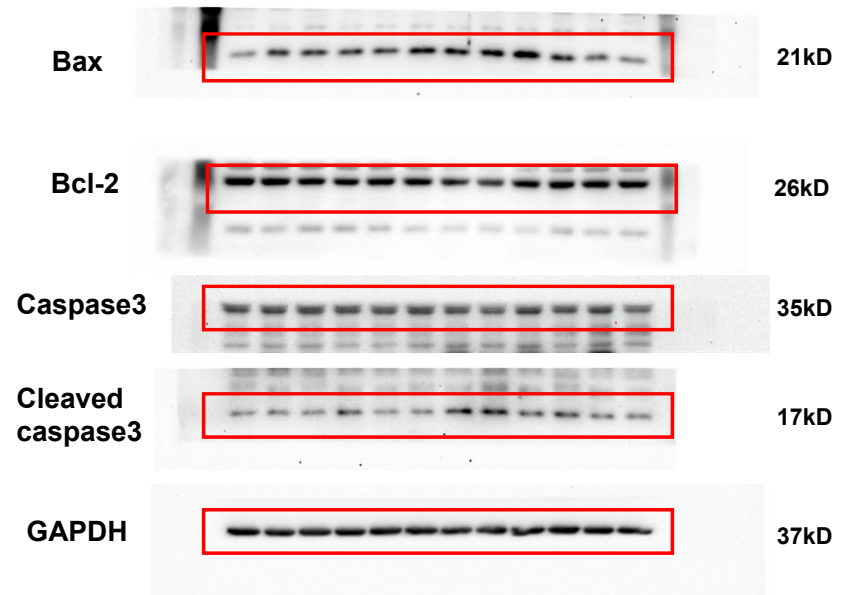

### Western blot for Fig5E

HO-1  28kD

Tubulin  55kD

### Western blot for Fig5F

TNF $\alpha$   21kD

Tubulin 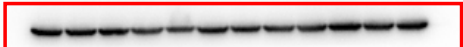 55kD

IL-1 $\beta$  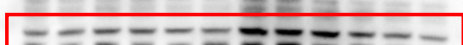 30kD

Tubulin  55kD
